# Supplementary material for: New porphyrin dendrimers with fluorenyl-based connectors: a simple way to improving the optical properties over dendrimers featuring 1,3,5-phenylene connectors
Source: Royal Society of Chemistry journal article supplement (doi:10.1039/c9nj06166e), 2020-01-01
Supplement: c9nj06166e1.pdf [file c9nj06166e1.pdf]

**New Porphyrin Dendrimers with Fluorenyl-based Connectors:  
A Simple Way to improving the Optical Properties over Dendrimers  
featuring 1,3,5-Phenylene Connectors**

Xu Zhang,<sup>a</sup> Sarra Ben Hassine,<sup>a,b</sup> Nicolas Richy,<sup>a</sup> Olivier Mongin,<sup>a</sup>  
Mireille Blanchard-Desce,<sup>c</sup> Frédéric Paul,<sup>a</sup> Christine O. Paul-Roth,<sup>a,\*</sup>

<sup>a</sup> Univ Rennes, INSA Rennes, CNRS, ISCR (Institut des Sciences Chimiques de Rennes) – UMR 6226, F-35000 Rennes, France.

<sup>b</sup> Faculté des Sciences de Tunis, Université de Tunis El Manar, Tunisie

<sup>c</sup> Univ. Bordeaux, Institut des Sciences Moléculaires (CNRS UMR 5255), 33405 Talence, France

\*Corresponding author: christine.paul@univ-rennes1.fr or christine.paul@insa-rennes.fr  
tel : (+33) (0) 2 23 23 63 72 fax: (+33) (0) 2 23 23 63 72

---

**Contents:**

|                                                                                                                                                                              |           |
|------------------------------------------------------------------------------------------------------------------------------------------------------------------------------|-----------|
| 1. <sup>1</sup> H NMR and <sup>13</sup> C{ <sup>1</sup> H} NMR spectra of the dendrons precursors <b>6</b> , <b>7</b> and of the porphyrin-based dendrimers <b>1,2</b> ..... | p. S2-5   |
| 2. <sup>1</sup> H NMR spectra of model compounds <b>4</b> and <b>5</b> .....                                                                                                 | p. S6     |
| 3. <sup>1</sup> H NMR spectra of compounds <b>10-11</b> , <b>14-16</b> and <sup>13</sup> C{ <sup>1</sup> H} NMR Spectra of porphyrin <b>8</b> .....                          | p. S7-10  |
| 4. Comparison between the <sup>1</sup> H NMR shifts of diagnostic protons .....                                                                                              | p. S11-12 |
| 5. Excitation spectra of dendrimers <b>1</b> and <b>2</b> .....                                                                                                              | p. S13    |

1.  $^1\text{H}$  NMR and  $^{13}\text{C}\{^1\text{H}\}$  NMR Spectra of the dendrons precursors 6, 7 and of the porphyrin-based dendrimers 1,2

Dendron Precursor 6:

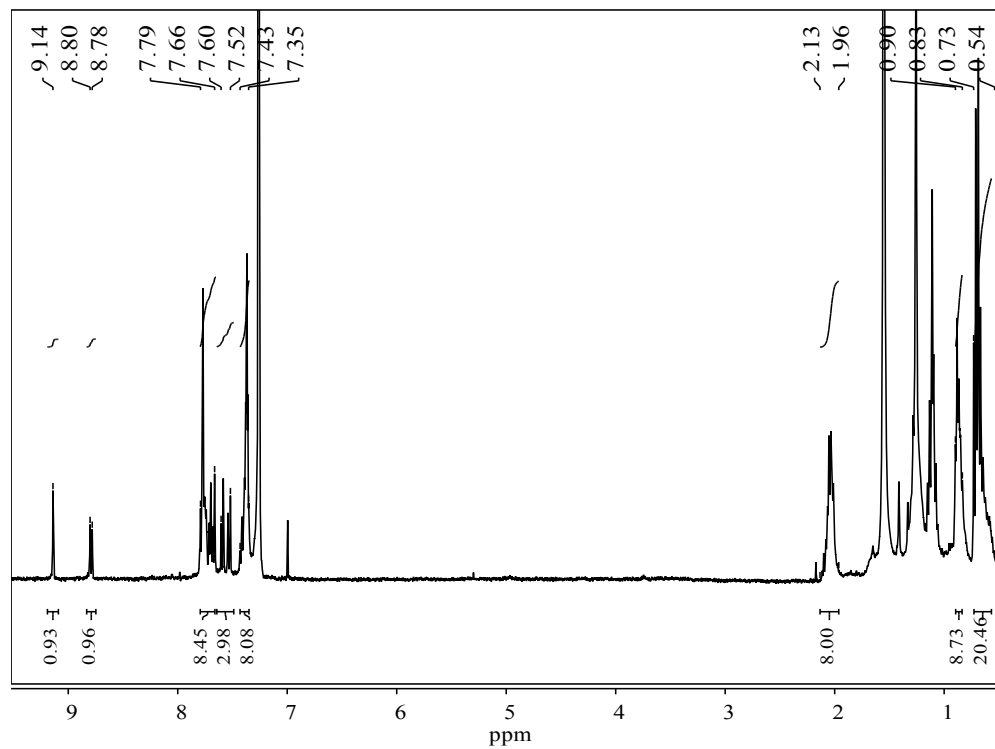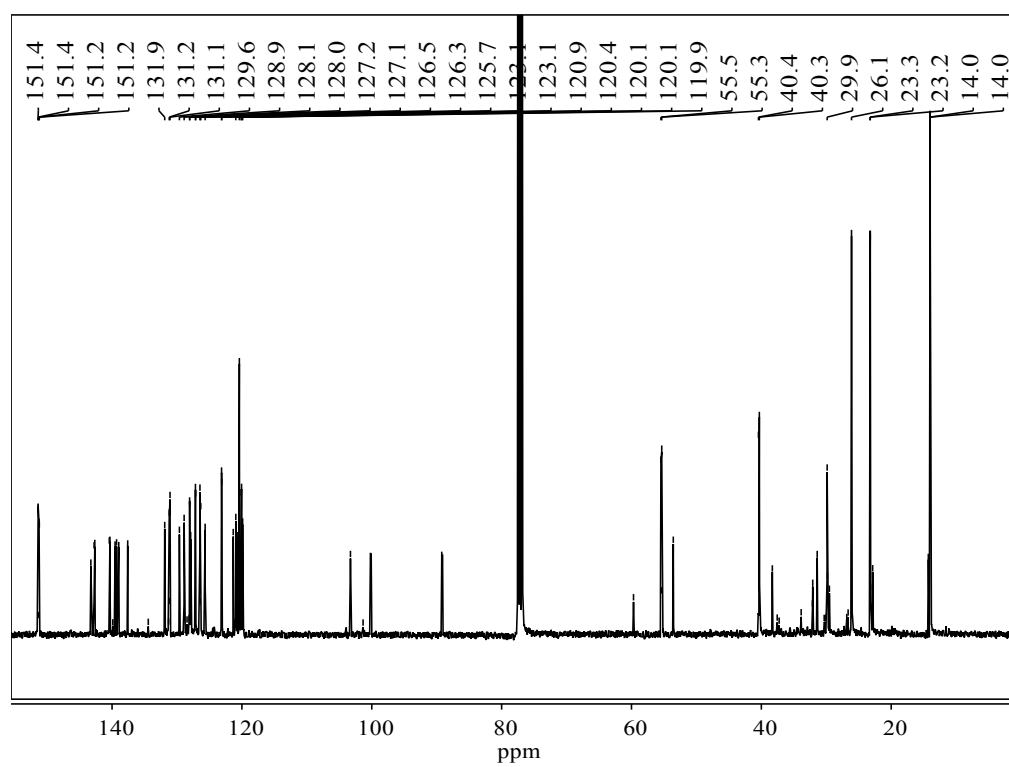

**Dendron Precursor 7:**

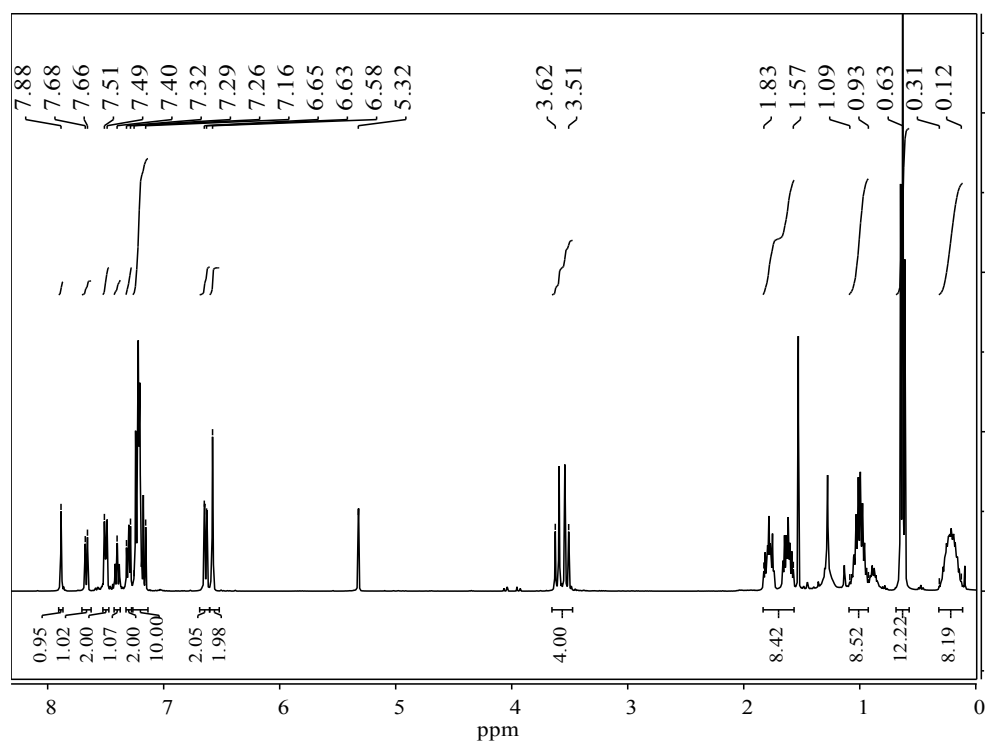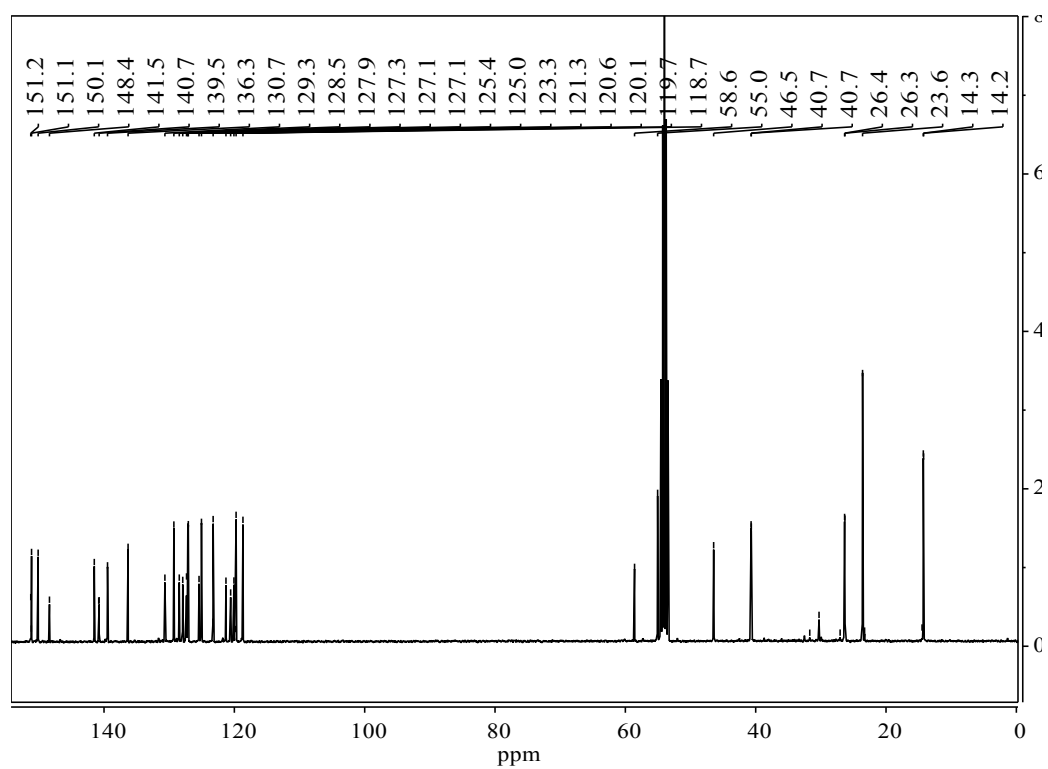

**Porphyrin-based Dendrimer 1:**

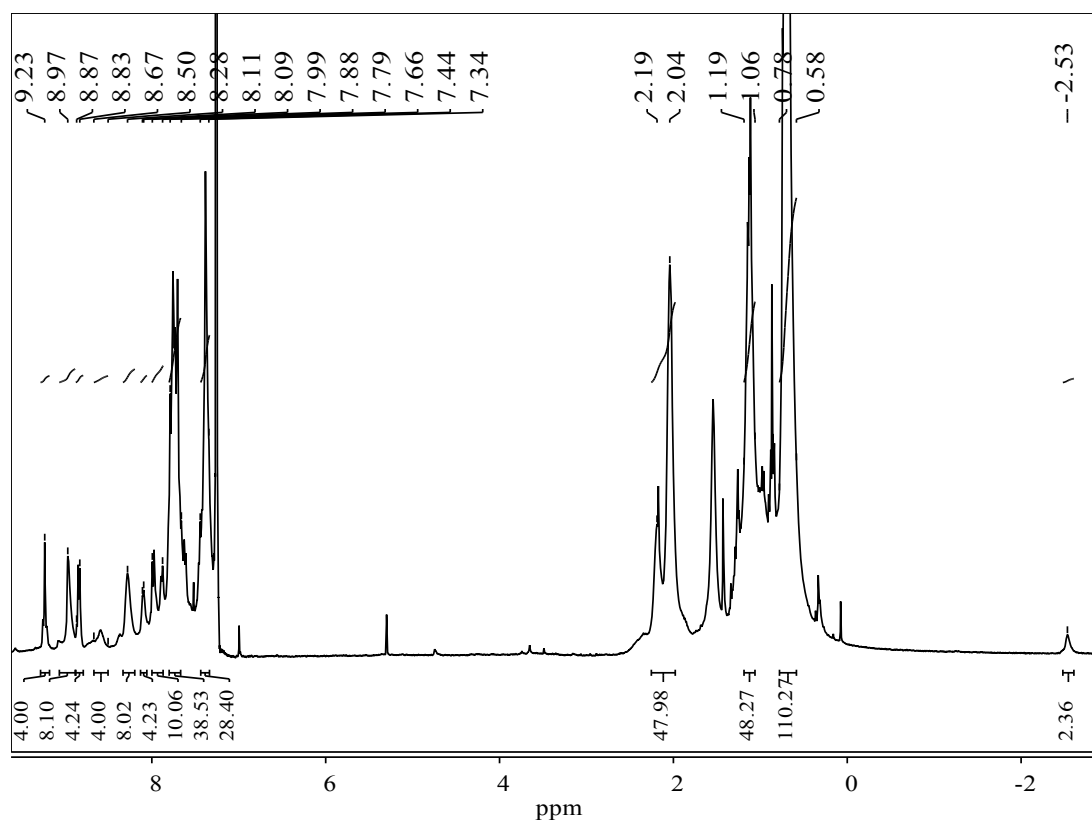

**Porphyrin-based Dendrimer 2:**

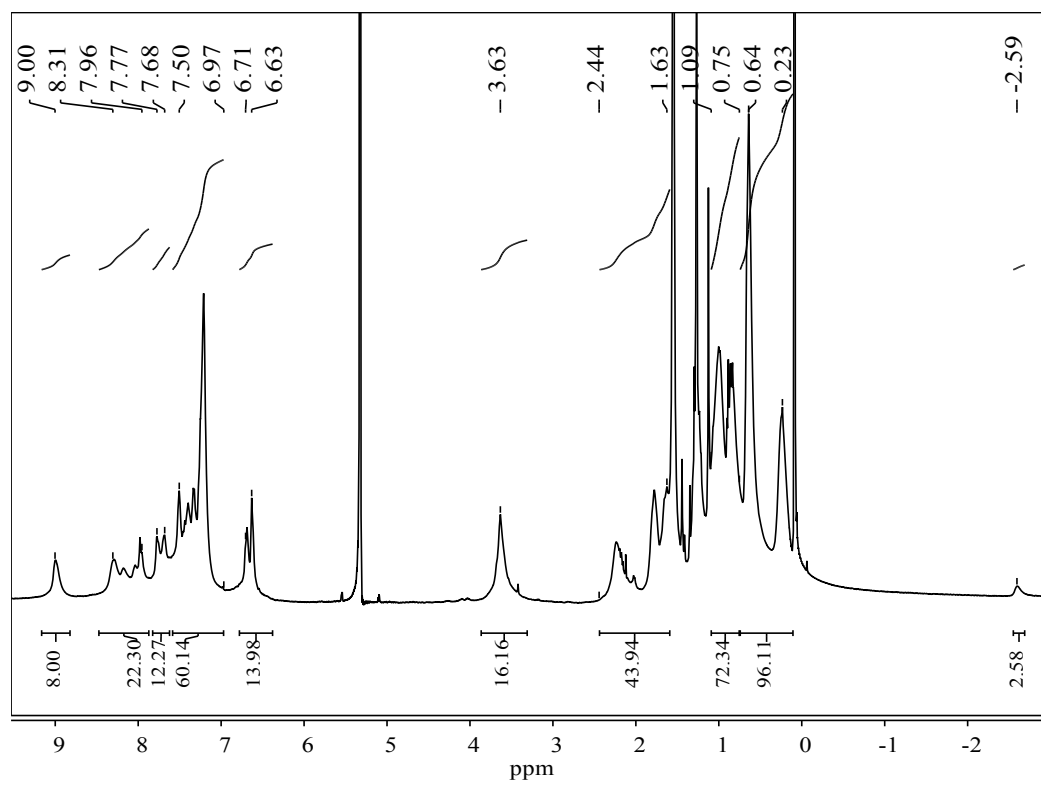

2.  $^1\text{H}$  NMR spectra of model compounds 4 and 5

## Compound 4:

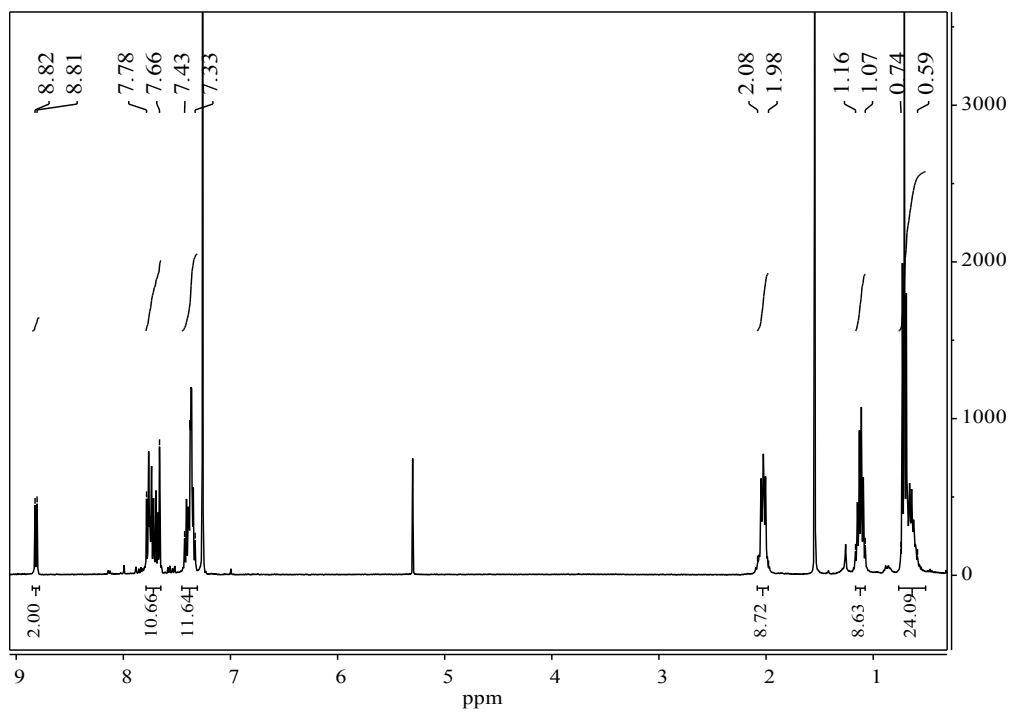

## Compound 5 :

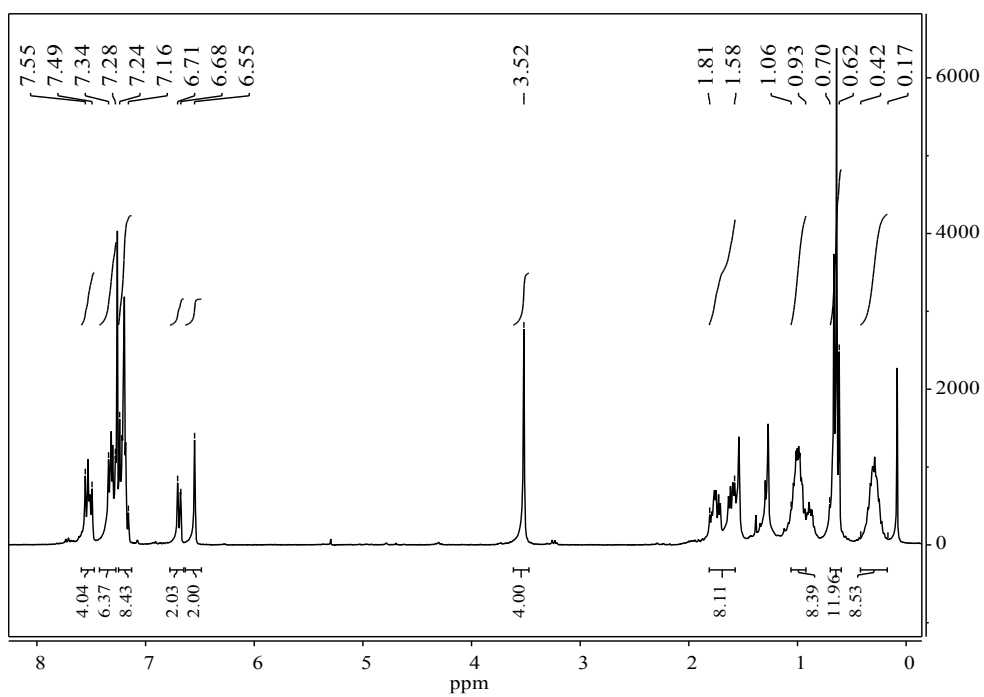

3.  $^1\text{H}$  NMR spectra of compounds 10-11, 14-16 and  $^1\text{H}$  NMR and  $^{13}\text{C}\{^1\text{H}\}$  NMR Spectra of porphyrin 8

Compound 10:

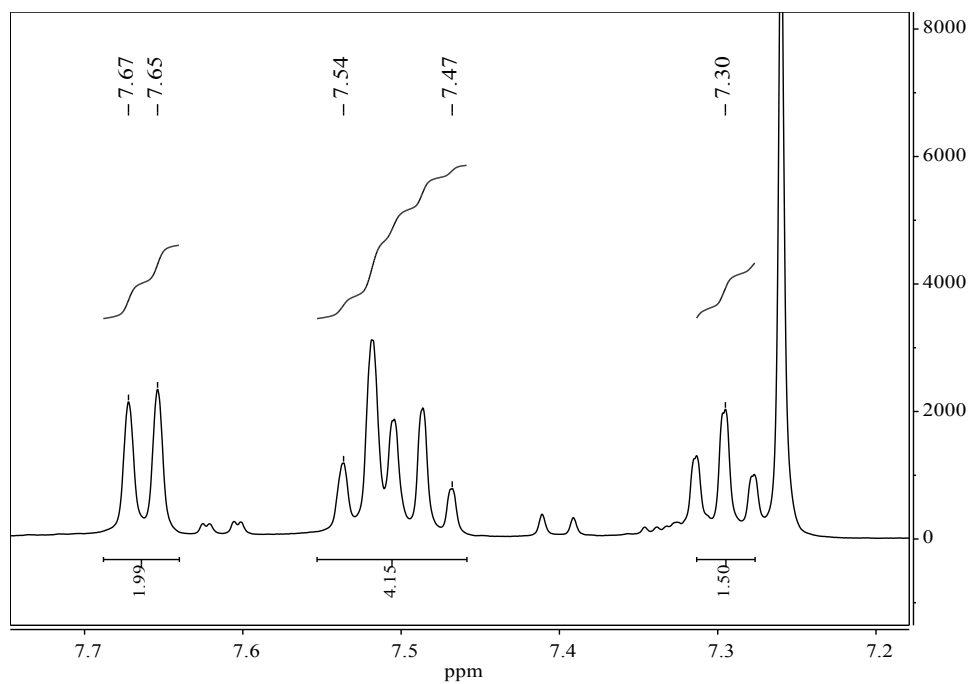

Compound 11a:

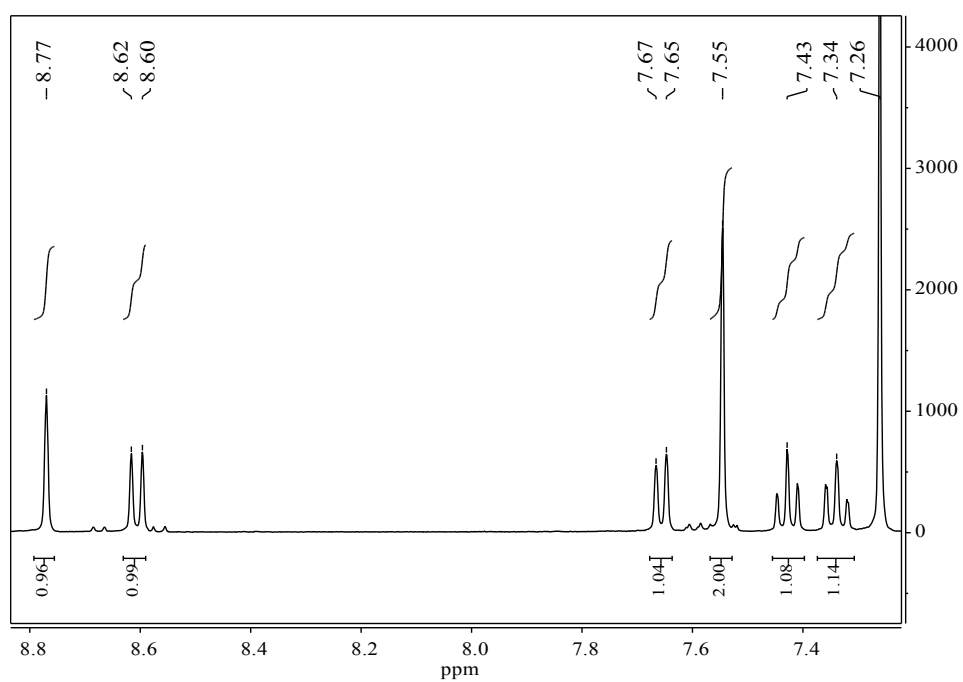

**Compound 11b:**

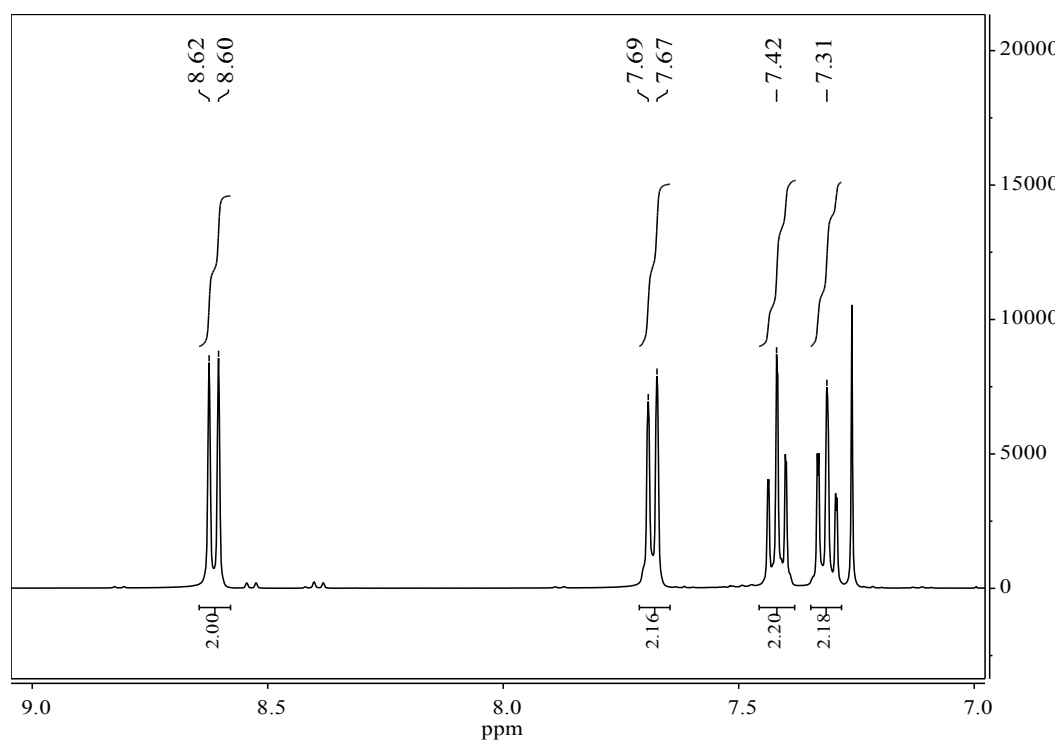

**Compound 15:**

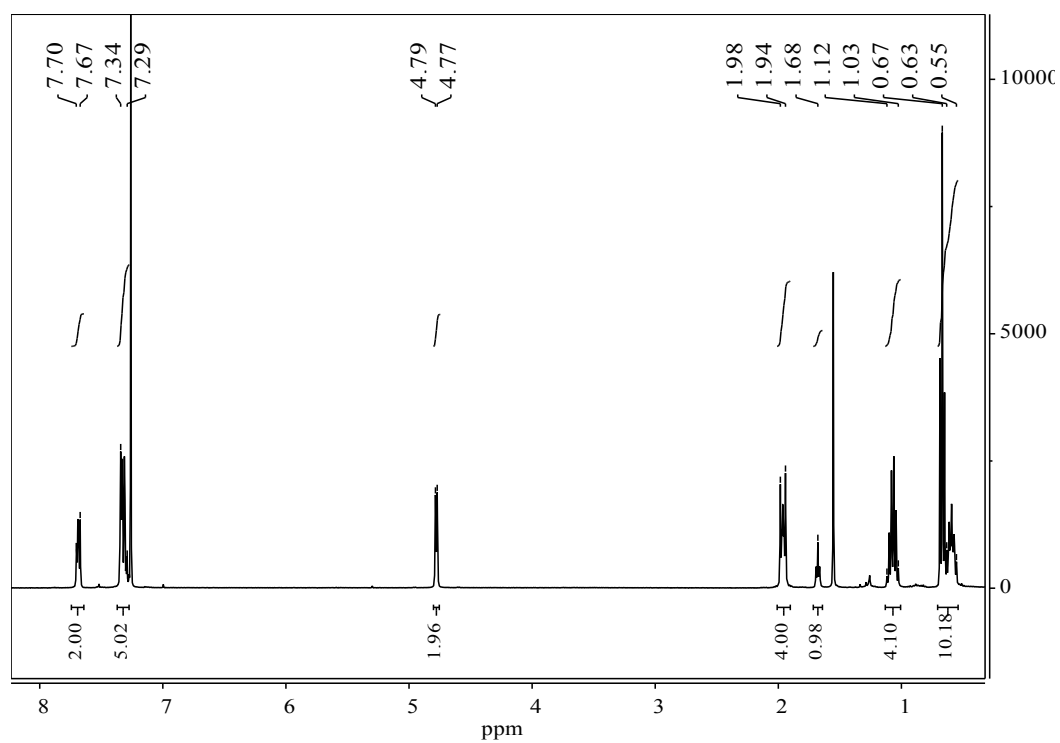



Compound 16:

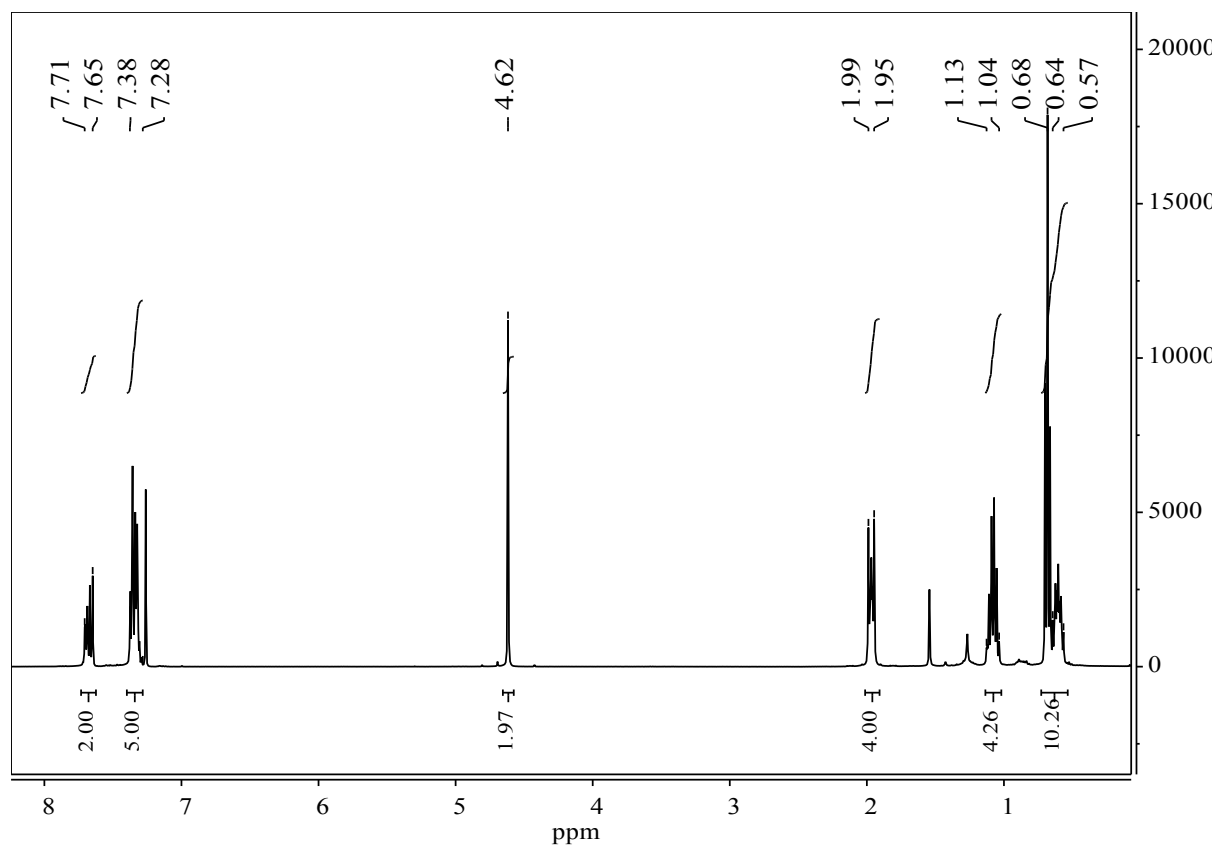

**Porphyrin 8:**

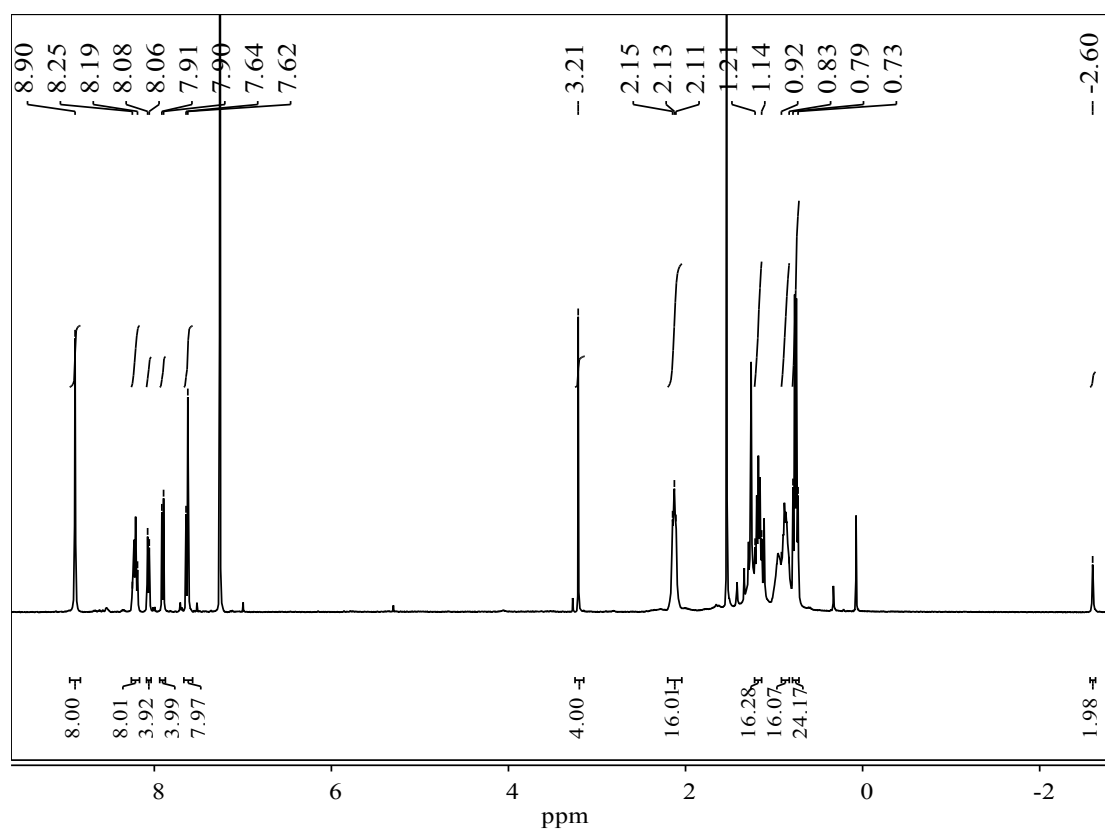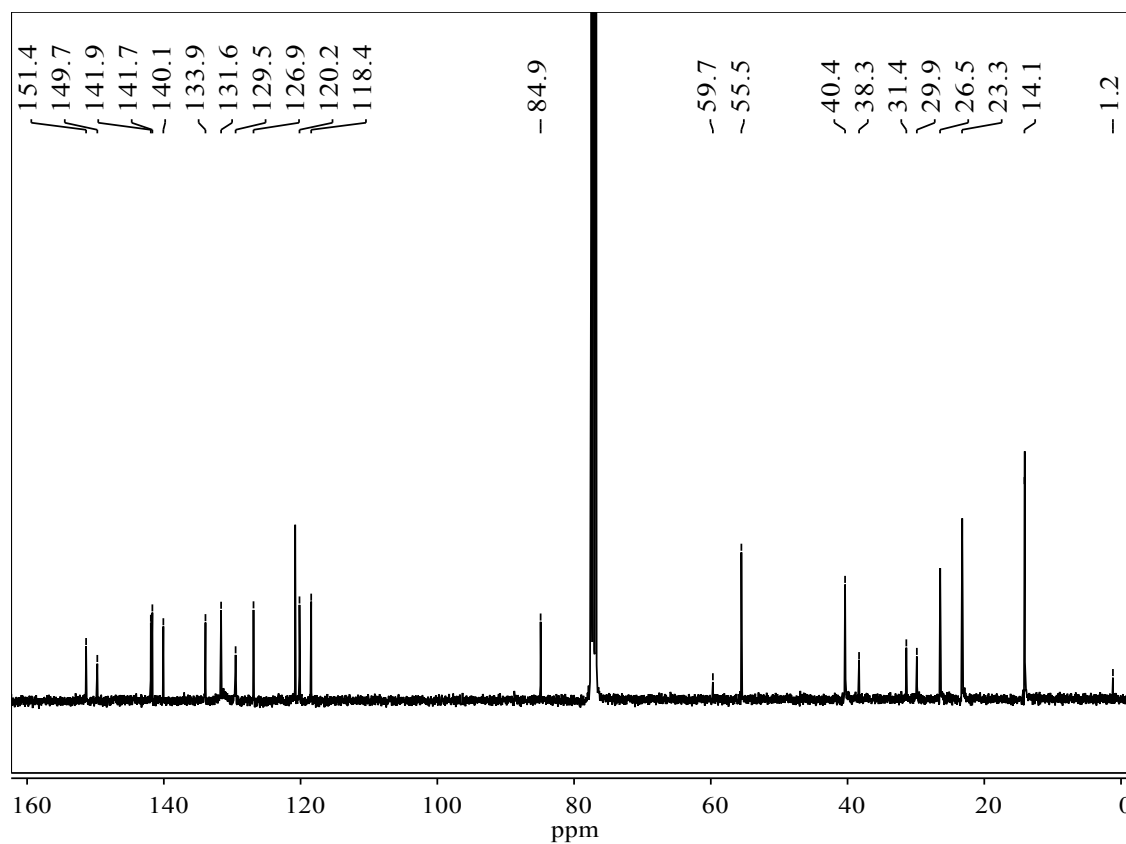

4. Comparison between the  $^1\text{H}$  NMR shifts of diagnostic protons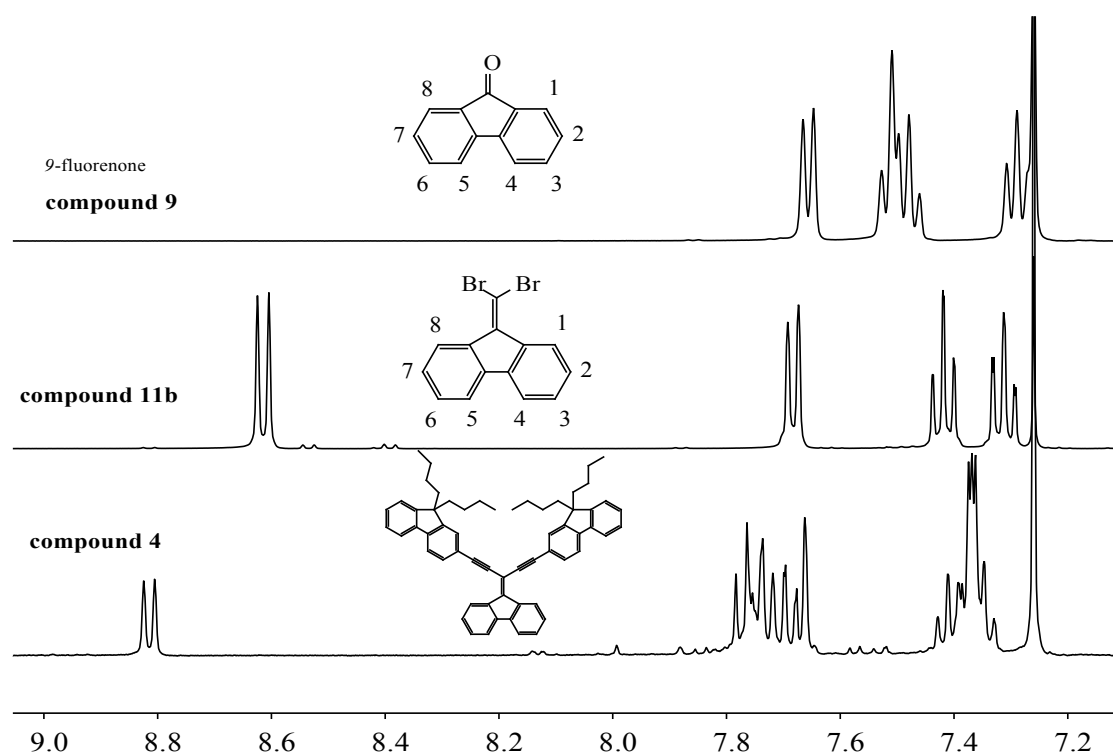

**Figure S1.** Comparative partial  $^1\text{H}$  NMR spectra of the commercial 9-fluorenone (**9**), the compound **11b** and the model compounds **4** in  $\text{CDCl}_3$ .

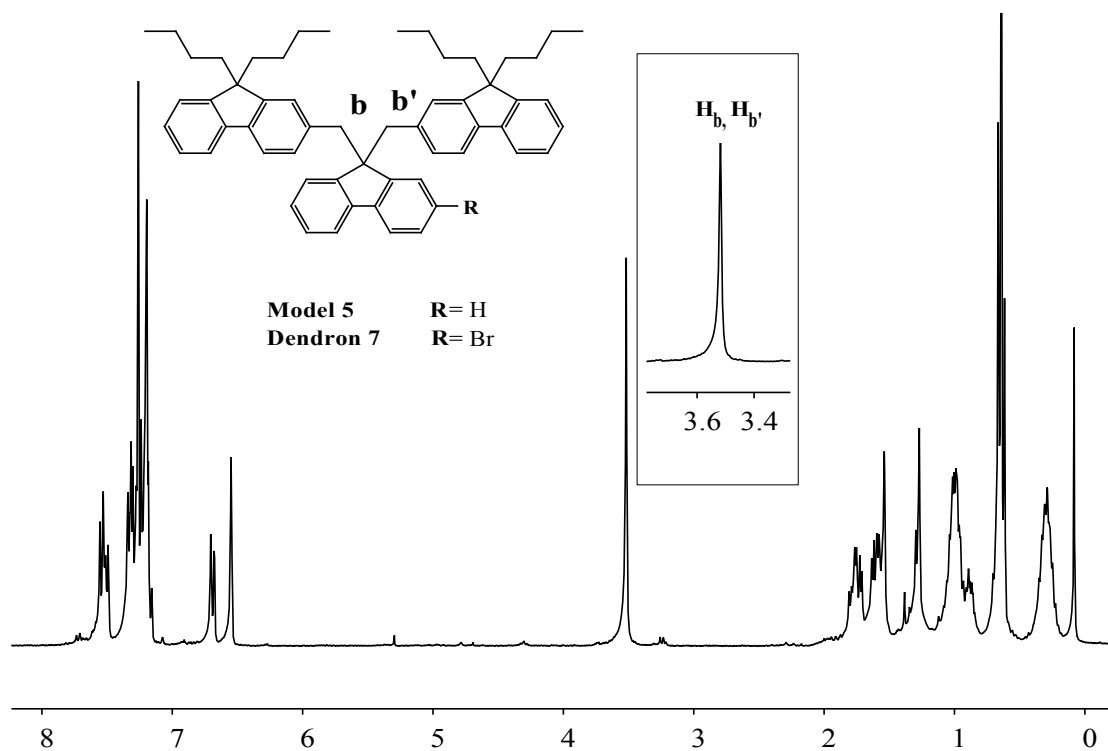(a) <sup>1</sup>H NMR spectrum of **Model 5** and **dendron 7** in CDCl<sub>3</sub>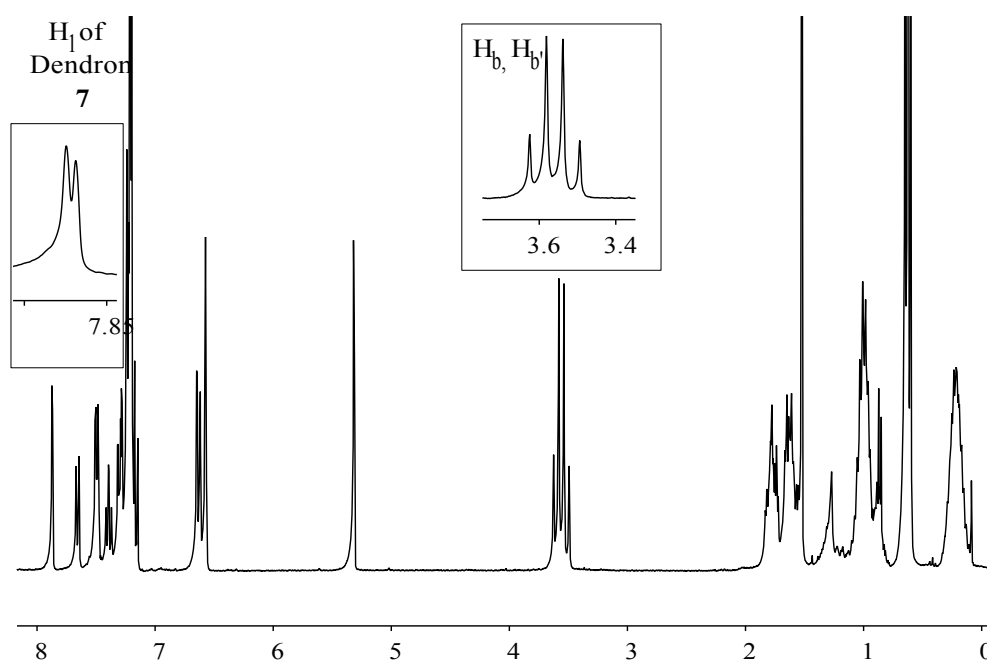(b) <sup>1</sup>H NMR spectrum of dendron precursor **7** in CD<sub>2</sub>Cl<sub>2</sub>

**Figure S2.** Comparison of <sup>1</sup>H NMR spectra of the symmetric **5** (a) and the unsymmetric **7** (b) dendron precursors.

5. Excitation spectra of dendrimers 1 and 2

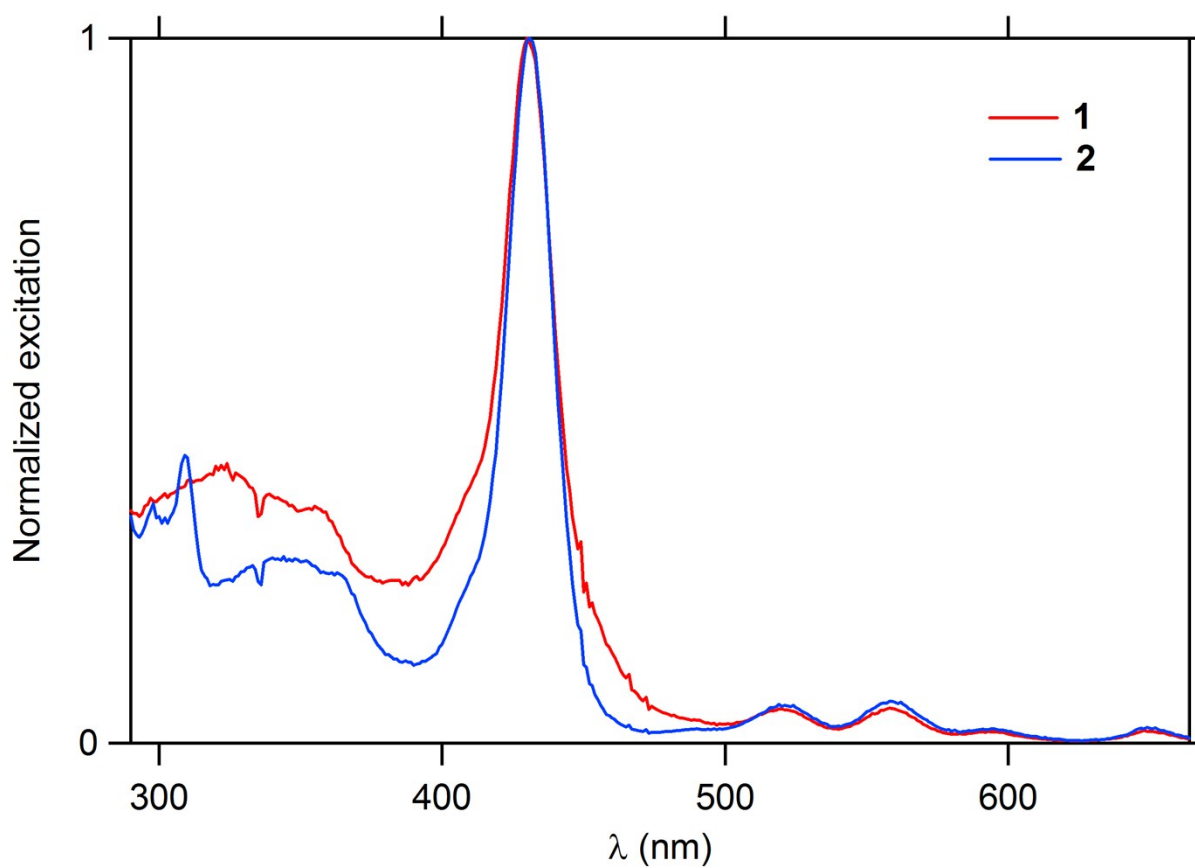

**Figure S3.** Excitation spectra of dendrimers 1 and 2 in dichloromethane through emission at 670 nm.
